# Supplementary material for: Removal of Nitrogen and Phosphorus from Thickening Effluent of an Urban Wastewater Treatment Plant by an Isolated Green Microalga
Source: MDPI journal article supplement (doi:10.3390/plants9121802), 2020-12-18
Supplement: s1 [file s1]

Supplementary materials:

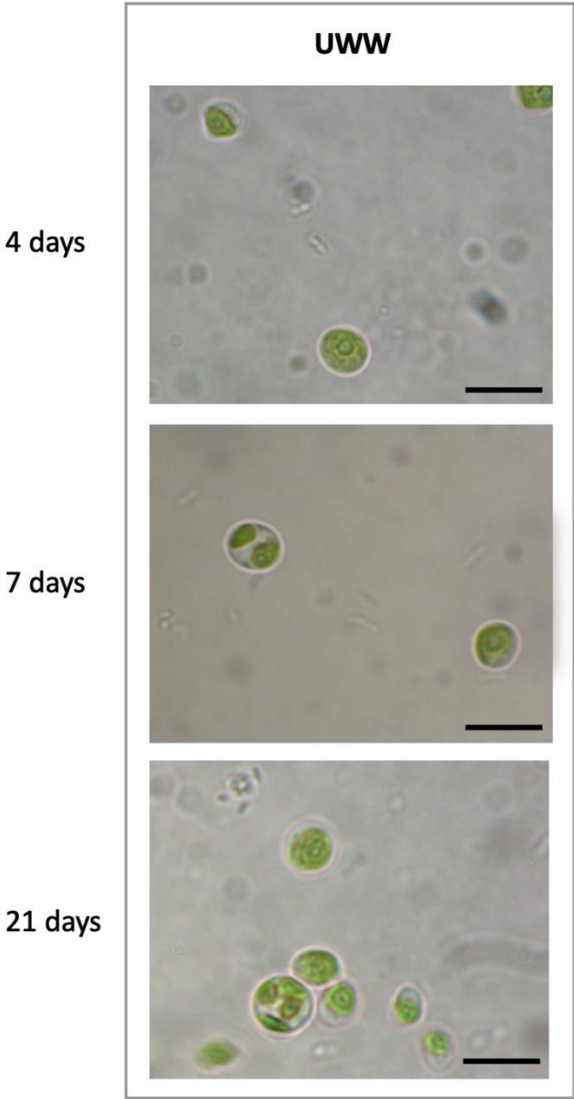

**Figure S1:** Light microscopy view of microalgae cultivated in UWW at 4, 7 and 21 days of cultivation. Bacterial contamination is showed. Bars, 5  $\mu$ m.
